# Supplementary material
Source: PubMed Central journal article supplement (PMC1754942)
Supplement: annrheumd_63_4_335__1.pdf [file annrheumd_63_4_335__1.pdf]

## Appendix W1. Checklist for rating the clinimetric quality of self-assessment questionnaires

| Clinimetric property                                  | Definition                                                                                                                                                                              | Criteria used to rate the clinimetric quality                                                                                                                                                                                                                                                                                                                                                                                                                                                                                                                                                                                                    |
|-------------------------------------------------------|-----------------------------------------------------------------------------------------------------------------------------------------------------------------------------------------|--------------------------------------------------------------------------------------------------------------------------------------------------------------------------------------------------------------------------------------------------------------------------------------------------------------------------------------------------------------------------------------------------------------------------------------------------------------------------------------------------------------------------------------------------------------------------------------------------------------------------------------------------|
| <b>Content validity</b>                               | The extent to which the domain of interest is comprehensively sampled by the items in the questionnaire.                                                                                | 1) patients were involved during item selection and/or item reduction<br>2) patients were consulted for reading and comprehension.<br><u>Rating:</u> + patients and (investigator or expert) involved<br>± patients only<br>- no patient involvement<br>? no information found on content validity                                                                                                                                                                                                                                                                                                                                               |
| <b>Readability &amp; comprehension</b>                | The questionnaire is understandable for all patients                                                                                                                                    | <u>Rating:</u> + readability tested; result was good<br>- inadequate readability<br>? no information found on readability and comprehension                                                                                                                                                                                                                                                                                                                                                                                                                                                                                                      |
| <b>Internal consistency</b>                           | The extent to which items in a (sub)scale are intercorrelated; a measure of the homogeneity of a (sub)scale                                                                             | 1) Factor analysis was applied in order to provide empirical support for the dimensionality of the questionnaire.<br>2) Cronbach's alpha between 0.70 and 0.90 for every dimension/subscale<br><u>Rating:</u> + adequate design & method; factor analysis; alpha 0.70-0.90<br>± doubtful method used<br>- inadequate internal consistency<br>? no information found on internal consistency                                                                                                                                                                                                                                                      |
| <b>Construct validity</b>                             | The extent to which scores on the questionnaire relate to other measures in a manner that is consistent with theoretically derived hypothesis concerning the domains that are measured. | 1) hypotheses were formulated<br>2) results were acceptable in accordance with the hypotheses<br>3) an adequate measure was used<br><u>Rating:</u> + adequate design, method, and result<br>± doubtful method used<br>- inadequate construct validity<br>? no information found on construct validity                                                                                                                                                                                                                                                                                                                                            |
| <b>Floor &amp; ceiling effects</b>                    | The questionnaire fails to demonstrate a worse score in patients clinically deteriorated and an improved score in patients who clinically improved                                      | 1) descriptive statistics of the distribution of scores were presented<br>2) 15% of respondents achieved the highest or lowest possible score<br><u>Rating:</u> + no floor / ceiling effects<br>- more than 15% in extremities<br>? no information found on floor and ceiling effects                                                                                                                                                                                                                                                                                                                                                            |
| <b>Test-retest reliability</b>                        | The extent to which the same results are obtained on repeated administrations of the same questionnaire when no change in physical functioning has occurred                             | 1) calculation of an intraclass correlation coefficient (ICC); ICC > 0.70<br>2) time interval and confidence intervals were presented<br><u>Rating:</u> + adequate design, method, and ICC > 0.70<br>± doubtful method was used<br>- inadequate reliability<br>? no information found on test-retest reliability                                                                                                                                                                                                                                                                                                                                 |
| <b>Agreement</b>                                      | the ability to produce exactly the same scores with repeated measurements                                                                                                               | 1) for evaluative questionnaires reliability agreement should be assessed<br>2) limits of agreement, Kappa, or standard error of measurement (SEM) was presented<br><u>Rating:</u> + adequate design, method and result<br>± doubtful method used<br>- inadequate agreement<br>? no information found on agreement                                                                                                                                                                                                                                                                                                                               |
| <b>Responsiveness</b>                                 | The ability to detect important change over time in the concept being measured                                                                                                          | 1) for evaluative questionnaires responsiveness should be assessed<br>2) hypotheses were formulated and results were in agreement<br>3) an adequate measure was used (ES, SRM, comparison with external standard)<br><u>Rating:</u> + adequate design, method and result<br>± doubtful method used<br>- inadequate responsiveness<br>? no information found on responsiveness                                                                                                                                                                                                                                                                    |
| <b>Interpretability</b>                               | The degree to which one can assign qualitative meaning to quantitative scores                                                                                                           | Authors provided information on the interpretation of scores:<br>1. presentation of means and SD of scores before and after treatment<br>2. comparative data on the distribution of scores in relevant subgroups<br>3. information on the relationship of scores to well-known functional measures or clinical diagnosis<br>4. information on the association between changes in score and patients' global ratings of the magnitude of change they have experienced<br><u>Rating:</u> + 2 or more of the above types of information was presented<br>± doubtful method used or doubtful description<br>? no information found on interpretation |
| <b>Minimal clinically important difference (MCID)</b> | The smallest difference in score in the domain of interest which patients perceive as beneficial and would mandate a change in patient's management                                     | Information is provided about what (difference in) score would be clinically meaningful.<br><u>Rating:</u> + MCID presented<br>- no MCID presented                                                                                                                                                                                                                                                                                                                                                                                                                                                                                               |
| <b>Time to administer</b>                             | Time needed to complete the questionnaire                                                                                                                                               | <u>Rating:</u> + less than 10 minutes<br>- more than 10 minutes<br>? no information found on time to complete the questionnaire                                                                                                                                                                                                                                                                                                                                                                                                                                                                                                                  |
| <b>Administration burden</b>                          | Ease of the method used to calculate the questionnaire's score                                                                                                                          | <u>Rating:</u> + easy: summing up of the items<br>± moderate: visual analogue scale (VAS) or simple formula<br>- difficult: VAS in combination with formula, or complex formula<br>? no information found on rating method                                                                                                                                                                                                                                                                                                                                                                                                                       |
