# Supplementary material
Source: PubMed Central journal article supplement (PMC1754942)
Supplement: annrheumd_63_4_335__2.pdf [file annrheumd_63_4_335__2.pdf]

**Table W1: content and construct validity of the shoulder disability questionnaires**

| questionnaire | content validity |                                     |                            |                         |                      | construct validity    |                |                                                                                                                 | study size |           |
|---------------|------------------|-------------------------------------|----------------------------|-------------------------|----------------------|-----------------------|----------------|-----------------------------------------------------------------------------------------------------------------|------------|-----------|
|               | item selection*  | item reduction*                     | level of reading examined* | dimensionality studied? | internal consistency | hypothesis            | (main) results | floor / ceiling effect                                                                                          |            |           |
| SDQ-UK        | w1               | patients<br>experts<br>investigator | no                         | no                      | ?                    | ?                     | yes            | score GP-patients > score community ;<br>restricted ROM -> higher disability                                    | ceiling†   | 54; 67    |
| SIQ           | w2               | patients<br>investigator            | yes                        | yes                     | ?                    | $\alpha = 0.91$       | yes            | Constant: $r = -0.56$<br>Rowe: $r = -0.51$<br>SF36 physical: $r = -0.71$                                        | no         | 92        |
| OSQ           | w3               | patients<br>investigator            | yes                        | yes                     | ?                    | $\alpha = 0.89$       | yes            | Constant: $r = -0.74$<br>SF36 physical: $r = -0.61$<br>HAQ disability: $r = 0.86$                               | no         | 111       |
| SDQ-NL        | w4               | experts<br>investigator             | yes                        | yes                     | ?                    | ?                     | ?              | ?                                                                                                               | ceiling‡   | 180       |
| RC-QOL        | w5               | patients<br>experts<br>investigator | yes                        | yes                     | ?                    | ?                     | yes            | SF36: $r = 0.78$ ; ASES: $r = 0.84$                                                                             | no         | 70        |
| DASH          | w6               | patients                            | yes                        | yes                     | ?                    | ?                     |                |                                                                                                                 | no         | 138       |
|               | w7               | experts                             |                            |                         |                      |                       | yes            | SPADI function: $r = 0.85$                                                                                      | no         | 23        |
|               | w8<br>w9         | investigator                        |                            |                         |                      |                       | yes<br>no      | SF36 physical: $r = -0.73$<br>Constant: $r = -0.76$                                                             | no<br>?    | 23        |
| WOSI          | w10              | patients<br>experts<br>investigator | yes                        | yes                     | ?                    | ?                     | yes            | DASH: $r = 0.77$ ; Constant: $r = 0.59$ ;<br>Rowe: $r = 0.61$ ; ASES: $r = 0.55$ ;<br>SF12 physical: $r = 0.66$ | ?          | 47        |
| SSRS          | w11              | investigator                        | no                         | no                      | ?                    | ?                     | no             | Constant: $r = 0.83$                                                                                            | no         | 200       |
|               | w12              |                                     |                            |                         |                      |                       | yes            | SF36 physical: $r = 0.12$ ; SST: $r = 0.47$ ;<br>SPADI: $r = 0.50$ ; m-ASES: $r = 0.50$ ;<br>SSI: $r = 0.48$    | no         | 90        |
| SRQ           | w13              | patients<br>investigator            | yes                        | yes                     | ?                    | $\alpha = 0.77-0.90¶$ | yes            | AIMS: $r = -0.84$                                                                                               | ?          | 97        |
| SST           | w14              | patients                            | no                         | no                      |                      |                       |                |                                                                                                                 |            |           |
|               | w12              | investigator                        |                            |                         |                      |                       | yes            | SF36 physical: $r = 0.58$ ; SSRS: $r = 0.47$ ;<br>SPADI: $r = 0.74$ ; m-ASES: $r = 0.73$ ;<br>SSI: $r = 0.80$   | no         | 90        |
|               | w9<br>w15        |                                     |                            |                         | yes                  | $\alpha = 0.85$       | no<br>no       | Constant: $r = 0.49$<br>SPADI: $r = -0.80$                                                                      | ?<br>?     | 23<br>192 |

| questionnaire | content validity |                                     |                            |                         |                      | construct validity               |                |                                                                                                 | study size |      |
|---------------|------------------|-------------------------------------|----------------------------|-------------------------|----------------------|----------------------------------|----------------|-------------------------------------------------------------------------------------------------|------------|------|
|               | item selection*  | item reduction*                     | level of reading examined* | dimensionality studied? | internal consistency | hypothesis                       | (main) results | floor / ceiling effect                                                                          |            |      |
| WOOS          | w16              | patients<br>experts<br>investigator | yes                        | yes                     | ?                    | ?                                | yes            | Constant: r = 0.73; ASES: r = 0.59;<br>SF12 physical: r = 0.65                                  | ?          | 41   |
| SSI           | w12              | ?                                   | ?                          | ?                       | ?                    | ?                                | yes            | SF36 physical: r = 0.59; SSRS: r = 0.48;<br>SST: r = 0.80; SPADI: r = 0.79;<br>m-ASES: r = 0.79 | no         | 90   |
| UEFS          | w17              | experts                             | yes                        | no                      | yes                  | $\alpha = 0.83-0.93^{**}$        | no             | significant difference between levels<br>of severity                                            | no         |      |
| ASES          | w18              | experts<br>investigator             | yes                        | no                      | ?                    |                                  | no             | Constant: r = 0.87                                                                              | ?          | 23   |
|               | w9               |                                     |                            |                         |                      |                                  | yes            | SF36 physical: r = 0.60; SST: r = 0.73;<br>SSRS: r = 0.50; SPADI: r = 0.77;<br>SSI: r = 0.79    | no         | 90   |
|               | w10              |                                     |                            |                         |                      |                                  | yes            | WOSI: r = 0.55                                                                                  | ?          |      |
|               | w16              |                                     |                            |                         |                      |                                  | yes            | WOOS: r = 0.59                                                                                  | ?          |      |
|               | w19<br>w20       |                                     |                            |                         |                      |                                  | no             | Rowe: r = 0.82; UCLA: r = 0.50                                                                  | ?          |      |
|               |                  |                                     |                            |                         |                      | $\alpha = 0.90$                  |                |                                                                                                 |            |      |
| SPADI         | w21              | experts                             | yes                        | no                      | yes                  |                                  | yes            | ROM: r = -0.54 - -0.80                                                                          | ?          | 37   |
|               | w22              |                                     |                            |                         |                      |                                  | no             | HAQ: r = 0.61; SF-20 physical: r = -0.50                                                        | no         | 102  |
|               | w23              |                                     |                            |                         |                      |                                  | yes            | SIP: r = 0.21 - 0.57                                                                            | no         | 94   |
|               | w15              |                                     |                            |                         | yes                  |                                  | no             | UCLA function: r = -0.64                                                                        | ?          | 192  |
|               | w12              |                                     |                            |                         |                      |                                  | yes            | SF36 physical: r = 0.58; SST: r = 0.74;<br>SSRS: r = 0.50; m-ASES: r = 0.77;<br>SSI : r = 0.79  | no         | 90   |
|               | w7<br>w20        |                                     |                            |                         |                      |                                  | yes            | DASH: r = 0.85                                                                                  | ?          | 138  |
|               |                  |                                     |                            |                         |                      | $\alpha = 0.94^{\dagger\dagger}$ |                |                                                                                                 |            |      |
| UEFL          | w24              | investigator                        | no                         | no                      | yes                  | ?                                | yes            | prevalence of self-reported difficulty at<br>each level of functional limitation                | floor      | 1002 |

\* results based on first reference; † ceiling effect in community sample with shoulder disorders; ‡ ceiling effect in people who got physiotherapy treatment for soft tissue disorders; floor effect in healthy community dwelling woman and moderately to sever disabled woman (age > 65 years); ¶ subscales daily activities, recreational and athletic activities, and work; \*\* range across study groups; †† value of subscale disability;  $\alpha$  = chronbach's alpha; ? = no data published; r = correlation coefficient; AIMS = Arthritis Impact Measurement Scales Health Status Questionnaire <sup>w25</sup>; Constant = Constant Score <sup>w26</sup>; Rowe Rating Scale <sup>w27</sup>; SF-36 = Medical Outcome Study Short-Form 36 <sup>w28</sup>; HAQ = Health Assessment Questionnaire <sup>w29</sup>; SIP = Sickness Impact Profile <sup>w30</sup>; UCLA = University California - Los Angeles Shoulder Scale <sup>w31;w32</sup>

**Table W2: reproducibility of the shoulder disability questionnaires**

| questionnaire | reliability (I)                                                                   | time interval | agreement (II)                              | study size*      |
|---------------|-----------------------------------------------------------------------------------|---------------|---------------------------------------------|------------------|
| SDQ-UK        | w1 ?                                                                              | ?             | ?                                           | ?                |
| SIQ           | w2 r = 0.97                                                                       | 24 hours      | CoR = 5.7                                   | 34 (I, II)       |
| OSQ           | w3 ?                                                                              | 24 hours      | CoR = 6.8;<br>MD = -0.12 (out of score 1-5) | 60 (II)          |
| SDQ-NL        | w4 ?                                                                              | ?             | ?                                           | ?                |
| RC-QOL        | w5 ?                                                                              | 2 weeks       | MD = 5.05 (out of score 0-100)              | 30 (II)          |
| DASH          | w6 ICC = 0.96                                                                     | 3-5 days      | SEM = 4.6 (score 0-100)                     | 73 (I); 56 (II)  |
| WOSI          | w10 ICC = 0.91†                                                                   | 2 weeks       | ?                                           | 51 (I)           |
| SSRS          | w33 ICC = 0.71                                                                    | 1 week        | % = 63 [71]                                 | 41 (I, II)       |
| SRQ           | w13 r = 0.89-0.96‡                                                                | ± 3 days      | Kappa = 0.73 - 0.97                         | 40 (I)           |
| SST           | w33 ICC = 0.99                                                                    | 1 week        | % = 80 [95]                                 | 41 (I, II)       |
|               | w15                                                                               |               | SEM = 11.65 (score 0-100)                   | 192 (II)         |
| WOOS          | w16 ICC = 0.94†                                                                   | 3 months      | ?                                           | 22 (I)           |
| SSI           | w33 ICC = 0.97                                                                    | 1 week        | % = 24 [NA]                                 | 41 (I, II)       |
| UEFS          | w17 ?                                                                             | ?             | ?                                           |                  |
| ASES          | w33 ICC = 0.96                                                                    | 1 week        | % = 31 [51]                                 | 41 (I, II)       |
|               | w20 ICC = 0.78 (0.59-0.89) post-surgical ;<br>ICC = 0.86 (0.72-0.94) non-surgical | 1 week        |                                             | 31(I)<br>25 (I)  |
| SPADI         | w21 ICC = 0.64¶                                                                   | 24 hours      |                                             | 23 (I)           |
|               | w15                                                                               |               | SEM = 5.78¶                                 | 192 (II)         |
|               | w33 ICC = 0.91                                                                    | 1 week        | % = 5 [23]                                  | 41 (I, II)       |
|               | w20 ICC = 0.57 (0.27-0.77) post-surgical ;<br>ICC = 0.84 (0.66-0.92) non-surgical | 1 week        |                                             | 31 (I)<br>25 (I) |
| UEFL          | w24 ?                                                                             | ?             | ?                                           | ?                |

\* study size for study of study of reliability (I) and study of agreement (II); † subscale "sport, recreation and work"; ‡ subscales "daily activities", "recreational and athletic activities", and "work"; ¶ value of subscale function/disability with confidence intervals (in brackets) for post- and non-surgical patients"; ¶ value of subscale disability; ? = no data published; r = correlation coefficient; CoR = coefficient of reliability<sup>w34</sup>; MD = mean difference; SEM = standard error of measurement; Kappa = the proportion of the observed agreement that exceeds the agreement that is expected by chance alone; % perfect agreement: percent of subjects having identical scores; % perfect agreement within 1 response category (in brackets); NA = not applicable

**Table W3: responsiveness and interpretability of the shoulder disability questionnaires**

| questionnaire | <i>responsiveness</i> |                            |                         | Hypothesis | (main) results                                                                             | <i>interpretability</i>        |                               |                                                                                            | MCID                                                                                                                          |                   |
|---------------|-----------------------|----------------------------|-------------------------|------------|--------------------------------------------------------------------------------------------|--------------------------------|-------------------------------|--------------------------------------------------------------------------------------------|-------------------------------------------------------------------------------------------------------------------------------|-------------------|
|               | treatment             | time to follow-up          | study size              |            |                                                                                            | attention for interpretability | baseline and follow up scores | scores of relevant subgroups                                                               |                                                                                                                               |                   |
| SDQ-UK        | w1                    | ?                          | ?                       | ?          | ?                                                                                          | ?                              | no                            | ?                                                                                          | ?                                                                                                                             | no                |
| SIQ           | w2                    | physiotherapy / surgery    | 6 months                | no         | ES = 0.8<br>sign. difference between improved - not-improved                               | 64                             | no                            | 36.6; 95%CI: 34.4-38.8 (baseline);<br>28.3; 95%CI: 35.6-31.1 (follow-up)*                  | comparison of change scores with regard to the patients assessment of change                                                  | no                |
| OSQ           | w3                    | surgery                    | 6 months                | no         | ES = 1.2<br>sign. difference between improved - not-improved                               | 56                             | no                            | 36.3; 95%CI: 34.6-37.9 (baseline);<br>26.0; 95%CI: 23.0-28.9 (follow-up)*                  | comparison of change scores with regard to the patients assessment of change                                                  | no                |
| SDQ-NL        | w4                    | physiotherapy              | 6 weeks                 | no         | CRR = 1.14<br>ROC curve; AUC = 0.72                                                        | 180                            | no                            | 74 (63, 85) (stable);<br>70 (58, 78) (improved)†                                           | median + percentiles of stable / improved patients for shoulder pain, chief complaint, symptoms and mobility                  | no                |
|               | w35                   | general practice           | 1 and 6 months          | no         | MCS: 20; 35<br>CRR = 2.22; 1.89<br>ROC curve; AUC = 0.84; 0.88                             | 308                            | yes                           | 67 (±23) (baseline);<br>47 (±31) (1 month);<br>32 (±31) (6 months)‡                        | mean change scores for clinical stable, improved and deteriorated patients                                                    | 3 items           |
| RC-QOL        | w5                    | surgery                    | 42 months (range 25-71) | ?          | ?                                                                                          | ?                              | no                            | 69.9 (4.4-100) (follow up)                                                                 | scores of large and massive rotator cuff tears                                                                                | no                |
| DASH          | w7                    | surgery                    | 3 months                | yes        | MCS: -13.4 (SD 16.6)<br>SRM = 0.81<br>ES = 0.64<br>functional status: r =0.69<br>ROC curve | 138                            | no                            | 48.8 (±21.0) (baseline);<br>35.3 (± 21.3) (follow-up)‡                                     | mean + SD wrist/hand patients; transition scale; comparison of change scores with regard to the patients assessment of change | no                |
|               | w6                    | ?                          | 3 months                | yes        | SRM =0.71<br>WOSI: r = 0.76                                                                | 47                             | no                            | ?                                                                                          | ?                                                                                                                             | NA                |
|               | w9                    | surgery                    | 57.8 weeks (±15.7)‡     | no         |                                                                                            | 23                             | no                            | 49.6 (±8.5) (pre-operative);<br>21.6 (±13.0) (post-operatiave)                             | ?                                                                                                                             | no                |
| WOSI          | w10                   | non specified treatment OA | 3 months                | yes        | SRM = 0.93<br>DASH: r = 0.76<br>Constant: r =0.69<br>ASES: r = 0.50                        | 47                             | no                            | ?                                                                                          | ?                                                                                                                             | no                |
| SSRS          | w11                   | surgery                    | 3 and 12 months         | no         |                                                                                            | ?                              | yes                           | 47(pre), 83 (post)¶; SA**<br>72 (pre),95 (post)¶; Bankart**<br>42 (pre), 52 (post)¶; MUA** | median+range diagnostic groups; comparison of change scores with regard to the patients assessment of treatment results       | no                |
|               | w33                   | surgery                    | 6 months                | yes        | MCS: 16.4<br>SRM = 0.65                                                                    | 33                             | no                            | 52.2 (baseline); 69.1 (follow up)                                                          | ?                                                                                                                             | no                |
| SRQ           | w13                   | surgery                    | 12 months               | no         | SRM = 1.9 (1.1 - 1.8)*<br>MCS: 26.7 (1.7 - 4.9)*<br>IoR = 1.6 (1.1 - 2.0)*                 | 30                             | yes                           | 61.6 (±13.4) (pre-operative);<br>88.3 (±10.0) (post-operative)‡                            | overall score, scale-scores; initial score; score at one year follow up                                                       | 2 points / domain |

| questionnaire | responsiveness |                             |                        | hypothesis | (main) results                                                           | study size    | Interpretability               |                                                                    | baseline and follow up scores                                                                          | scores of relevant subgroups | MCID |
|---------------|----------------|-----------------------------|------------------------|------------|--------------------------------------------------------------------------|---------------|--------------------------------|--------------------------------------------------------------------|--------------------------------------------------------------------------------------------------------|------------------------------|------|
|               | treatment      | time to follow-up           |                        |            |                                                                          |               | attention for interpretability |                                                                    |                                                                                                        |                              |      |
| SST           | w14            | surgery                     | 6 months               | no         | % progress per item<br>MCS: 17.2<br>SRM = 0.87                           | 9 - 29        | yes                            | % item score<br>36.0 (baseline); 53.8 (follow up)                  | % score diagnostic groups<br>?                                                                         | no                           |      |
|               | w33            |                             |                        | yes        |                                                                          | 33            | no                             |                                                                    |                                                                                                        |                              |      |
|               | w15            | surgery                     | 57.8 weeks<br>(±15.7)‡ | no         |                                                                          | 23            | no                             | 3.30 (±1.82) (pre-operative),<br>6.97 (±1.80) (post-operative)     | ?                                                                                                      | no                           |      |
| WOOS          | w16            | surgery                     | 3 months               | yes        | SRM = 1.91<br>Constant: r = 0.69<br>ASES: r = 0.43                       | 41            | no                             | ?                                                                  | ?                                                                                                      | no                           |      |
| SSI           | w33            | surgery                     | 6 months               | yes        | MCS: 20.1<br>SRM = 1.05                                                  | 33            | no                             | 47.0 (baseline); 67.3 (follow up)                                  | ?                                                                                                      | no                           |      |
| UEFS          | w17            | ?                           | 19 months<br>(12-24)   | no         | SRM = -1.33<br>average pain: r = 0.58                                    | 16            | no                             | 43.3 (3.3-75.9) (baseline);<br>31.5 (0.0-62.0) (follow up)         | working status; duration symptoms                                                                      | no                           |      |
| ASES          | w9             | surgery                     | 57.8 weeks<br>(±15.7)‡ | no         |                                                                          | 23            | no                             | 33.9 (± 15.9) (pre-operative);<br>71.9 (± 16.8) (post-operative)   | ?                                                                                                      | no                           |      |
|               | w33            | surgery                     | 6 months               | yes        | MCS: 17.6<br>SRM = 0.93                                                  | 33            | no                             | 49.4 (baseline); 68.0 (follow up)                                  | ?                                                                                                      | no                           |      |
|               | w10            | non-defined<br>treatment OA | 3 months               | yes        | SRM = 0.54<br>WOSI: r = 0.50                                             | 47            | no                             | ?                                                                  | ?                                                                                                      | no                           |      |
|               | w16            | surgery                     | 6 months               | yes        | SRM = 1.29<br>WOOS: r = 0.43                                             | 41            | no                             | ?                                                                  | ?                                                                                                      | no                           |      |
|               | w20            | ?                           | ?                      | ?          | ?                                                                        | 31; 25        | no                             | 65.7 (± 22.7) (post-surgical);<br>66.4 (± 22.9) (non-surgical)‡    | ?                                                                                                      |                              |      |
| SPADI         | w21            | medication or<br>injection  | 30 days                | no         | ROM: r = -0.52 - -0.70<br>MCS: -25.3††                                   | 30            | no                             | ?                                                                  | ?                                                                                                      | no                           |      |
|               | w22            | ?                           | 2, 4 and 12<br>weeks   | no         | overall status: r = 0.73;<br>r = 0.76; r = 0.79<br>ROC curve; AUC = 0.91 | 75            | yes                            | 57.6 (22.5) (baseline)‡;<br>-21.9-6.5 (change score)               | change score 2-4-12 weeks /<br>overall status (improved, same,<br>worse).                              | >10<br>points                |      |
|               | w23            | physiotherapy               | ±10 weeks              | no         | MCS: -28.4††<br>SRM = 1.04)††                                            | 34            | no                             | 33.9 (±28.1) (baseline);<br>-28.4 (±27.2) (change score)‡          | consensus between therapist and<br>patient judgement on meaningful<br>improvement in shoulder function | no                           |      |
|               | w33            | surgery                     | 6 months               | yes        | MCS: 25.6<br>SRM = 1.23                                                  | 33            | no                             | 39.9 (baseline); 66.4 (follow up)                                  | ?                                                                                                      | no                           |      |
|               | w7<br>w20      | surgery<br>?                | 3 months<br>?          | yes<br>?   | SRM = 0.71††<br>?                                                        | 138<br>31; 25 | no<br>no                       | ?<br>28.5 (±25.6) (post-surgical);<br>47.9 (±24.6) (non-surgical)‡ | ?<br>?                                                                                                 | no                           |      |
| UEFL          | w24            | ?                           | ?                      | ?          | ?                                                                        | no            | ?                              | ?                                                                  | no                                                                                                     |                              |      |

\* mean and 95% confidence interval; † mean and 25th and 75th percentiles; ‡ mean and SD; ¶ mean and range; ¶¶ median score pre-operative (pre) and post-operative (post); \*\* SA = subacromial decompression; Bankart = Bankart repair of anterior shoulder reconstruction; MUA = manipulation under anesthesia; †† disability scale; MCID = minimal clinically important difference; IoR = Index of Responsiveness<sup>w36</sup>; CRR = calibrated responsiveness ratio; MCS = mean change score; SRM = standardized response mean; ES = effect size

## Reference List

- w1. Croft P, Pope D, Zonca M, O'Neill T, Silman A. Measurement of shoulder related disability: results of a validation study. *Ann Rheum Dis* 1994;**53**:525-8.
- w2. Dawson J, Fitzpatrick R, Carr A. The assessment of shoulder instability. The development and validation of a questionnaire. *J Bone Joint Surg Br* 1999;**81**:420-6.
- w3. Dawson J, Fitzpatrick R, Carr A. Questionnaire on the perceptions of patients about shoulder surgery. *J Bone Joint Surg Br* 1996;**78**:593-600.
- w4. Heijden GJvd, Leffers P, Bouter LM. Shoulder disability questionnaire design and responsiveness of a functional status measure. *J Clin Epidemiol* 2000;**53**:29-38.
- w5. Hollinshead RM, Mohtadi NG, Vande Guchte RA, Wadey VM. Two 6-year follow-up studies of large and massive rotator cuff tears: comparison of outcome measures. *J Shoulder Elbow Surg* 2000;**9**:373-81.
- w6. Hudak PL, Amadio PC, Bombardier C. Development of an upper extremity outcome measure: the DASH (disabilities of the arm, shoulder and hand). The Upper Extremity Collaborative Group (UECG). *Am J Ind Med* 1996;**29**:602-8.
- w7. Beaton DE, Katz JN, Fossel AH, Wright JG, Tarasuk V, Bombardier C. Measuring the whole or the parts? Validity, reliability, and responsiveness of the Disabilities of the Arm, Shoulder and Hand outcome measure in different regions of the upper extremity. *J Hand Ther* 2001 ;**14**:128-46.
- w8. SooHoo NF, McDonald AP, Seiler JG, McGillivray GR. Evaluation of the construct validity of the DASH questionnaire by correlation to the SF-36. *J Hand Surg [Am]* 2002;**27**:537-41.
- w9. Skutek M, Fremerey RW, Zeichen J, Bosch U. Outcome analysis following open rotator cuff repair. Early effectiveness validated using four different shoulder assessment scales. *Arch Orthop Trauma Surg* 2000;**120**:432-6.
- w10. Kirkley A, Griffin S, McLintock H, Ng L. The development and evaluation of a disease-specific quality of life measurement tool for shoulder instability. The Western Ontario Shoulder Instability Index (WOSI). *Am J Sports Med* 1998;**26**:764-72.
- w11. Kohn D, Geyer M. The subjective shoulder rating system. *Arch Orthop Trauma Surg* 1997;**116**:324-8.
- w12. Beaton DE, Richards RR. Measuring function of the shoulder. A cross-sectional comparison of five questionnaires. *J Bone Joint Surg Am* 1996;**78**:882-90.
- w13. L'Insalata JC, Warren RF, Cohen SB, Altchek DW, Peterson MG. A self-administered questionnaire for assessment of symptoms and function of the shoulder. *J Bone Joint Surg Am* 1997;**79**:738-48.
- w14. Lippitt SB, Harryman DTI, Matsen FAI. A practical tool for evaluation of function: the simple shoulder test. *The Shoulder: a Balance of Mobility and Stability. Matsen FA III, FU FH, Hawkins RJ (ed). Rosemont, Illinois, The American Academy of Orthopaedic Surgeons* 1993;501-18.
- w15. Roddey TS, Olson SL, Cook KF, Gartsman GM, Hanten W. Comparison of the University of California-Los Angeles Shoulder Scale and the Simple Shoulder Test with the shoulder pain and disability index: single-administration reliability and validity. *Phys Ther* 2000;**80**:759-68.
- w16. Lo IK, Griffin S, Kirkley A. The development of a disease-specific quality of life measurement tool for osteoarthritis of the shoulder: The Western Ontario Osteoarthritis of the Shoulder (WOOS) index. *Osteoarthritis Cartilage* 2001;**9**:771-8.
- w17. Pransky G, Feuerstein M, Himmelstein J, Katz JN, Vickers-Lahti M. Measuring functional outcomes in work-related upper extremity disorders. Development and validation of the Upper Extremity Function Scale. *J Occup Environ Med* 1997;**39**:1195-202.
- w18. Richards RR, An K-N, Bigliani LU, Friedman RJ, Gartsman GM, Gristina AG *et al*. A standardized method for the assessment of shoulder function. *Journal of Shoulder and Elbow Surgery* 1994;**3**:347-52.
- w19. Romeo AA, Bach BR, O'Halloran KL. Scoring systems for shoulder conditions. *Am J Sports Med* 1996;**24**:472-6.

- w20. Cook KF, Roddey TS, Olson SL, Gartsman GM, Valenzuela FF, Hanten WP. Reliability by surgical status of self-reported outcomes in patients who have shoulder pathologies. *J Orthop Sports Phys Ther* 2002;**32**:336-46.
- w21. Roach KE, Budiman-Mak E, Songsirdej N, Lertratanakul Y. Development of a shoulder pain and disability index. *Arthritis Care Res* 1991;**4**:143-9.
- w22. Williams JW, Holleman DR, Simel DL. Measuring shoulder function with the Shoulder Pain and Disability Index. *J Rheumatol* 1995;**22**:727-32.
- w23. Heald SL, Riddle DL, Lamb RL. The shoulder pain and disability index: the construct validity and responsiveness of a region-specific disability measure. *Phys Ther* 1997;**77**:1079-89.
- w24. Simonsick EM, Kasper JD, Guralnik JM, Bandeen-Roche K, Ferrucci L, Hirsch R *et al*. Severity of upper and lower extremity functional limitation: scale development and validation with self-report and performance-based measures of physical function. *J Gerontol B Psychol Sci Soc Sci* 2001;**56**:10-9.
- w25. Meenan RF, Mason JH, Anderson JJ, Guccione AA, Kazis LE. AIMS2. The content and properties of a revised and expanded Arthritis Impact Measurement Scales Health Status Questionnaire. *Arthritis Rheum* 1992;**35**:1-10.
- w26. Constant CR, Murley AH. A clinical method of functional assessment of the shoulder. *Clin Orthop* 1987;160-4.
- w27. Rowe CR, Patel D, Southmayd WW. The Bankart procedure: a long-term end-result study. *J Bone Joint Surg Am* 1978;**60**:1-16.
- w28. Ware JE, Sherbourne CD. The MOS 36-item short-form health survey (SF-36). I. Conceptual framework and item selection. *Med Care* 1992;**30**:473-83.
- w29. Fries JF, Spitz P, Kraines RG, Holman HR. Measurement of patient outcome in arthritis. *Arthritis Rheum* 1980;**23**:137-45.
- w30. Bergner M, Bobbitt RA, Carter WB, Gilson BS. The Sickness Impact Profile: development and final revision of a health status measure. *Med Care* 1981;**19**:787-805.
- w31. Amstutz HC, Sew Hoy AL, Clarke IC. UCLA anatomic total shoulder arthroplasty. *Clin Orthop* 1981;7-20.
- w32. Ellman H, Hanker G, Bayer M. Repair of the rotator cuff. End-result study of factors influencing reconstruction. *J Bone Joint Surg Am* 1986;**68**:1136-44.
- w33. Beaton D, Richards RR. Assessing the reliability and responsiveness of 5 shoulder questionnaires. *J Shoulder Elbow Surg* 1998;**7**:565-72.
- w34. Bland JM, Altman DG. Statistical methods for assessing agreement between two methods of clinical measurement. *Lancet* 1986;**1**:307-10.
- w35. Windt DAvd, Heijden GJvd, Winter AFd, Koes BW, Deville W, Bouter LM. The responsiveness of the Shoulder Disability Questionnaire. *Ann Rheum Dis* 1998;**57**:82-7.
- w36. Guyatt G, Walter S, Norman G. Measuring change over time: assessing the usefulness of evaluative instruments. *J Chronic Dis* 1987;**40**:171-8.
